# Supplementary material
Source: PubMed Central journal article supplement (PMC3062042)
Supplement: supp_110.086181_86181SupTabS6v2.pdf [file supp_110.086181_86181SupTabS6v2.pdf]

**Supplemental Table S6.** Gene expression microarray studies performed on decidualized human endometrial stromal fibroblasts (hESF).

| Study                                                                                                                                                                                                                                                                                                                                                                                                              | Type & duration of treatment                                              | Type of hESF                                                       | Array Reference                                           |
|--------------------------------------------------------------------------------------------------------------------------------------------------------------------------------------------------------------------------------------------------------------------------------------------------------------------------------------------------------------------------------------------------------------------|---------------------------------------------------------------------------|--------------------------------------------------------------------|-----------------------------------------------------------|
| Popovici RM, Kao LC, Giudice LC. Discovery of new inducible genes in in vitro decidualized human endometrial stromal cells using microarray technology. <i>Endocrinology</i> 2000; 141: 3510-3513.                                                                                                                                                                                                                 | 10nM E2+1 $\mu$ M P4+20ng/ml EGF 10 days, <b>or</b> 1mM 8-Br cAMP 48hours | hESF; unknown endometriosis status                                 | Clontech Broad Coverage Atlas Human cDNA Expression Array |
| Brar AK, Handwerger S, Kessler CA, Aronow BJ 2001 Gene induction and categorical reprogramming during in vitro human endometrial fibroblast decidualization. <i>Physiol Genomics</i> 7:135-148                                                                                                                                                                                                                     | 10nM E2+1 $\mu$ M P4+ 0.05mM dibutyryl-cAMP; 2, 4, 6, 9, 12, 15 days      | Human decidual fibroblasts                                         | Incyte Genomics Human GEM-V                               |
| Tierney EP, Tulac S, Huang ST, Giudice LC 2003 Activation of the protein kinase A pathway in human endometrial stromal cells reveals sequential categorical gene regulation. <i>Physiol Genomics</i> 16:47-66                                                                                                                                                                                                      | 1mM 8-Br cAMP; 0, 2, 12, 24, 36, 48hours                                  | hESF from hysterectomized patients with no endometrial dysfunction | Affymetrix Hu95A                                          |
| Okada H, Nakajima T, Yoshimura T, Yasuda K, Kanzaki H. Microarray analysis of genes controlled by progesterone in human endometrial stromal cells in vitro. <i>Gynecol Endocrinol</i> 2003; 17: 271-280.                                                                                                                                                                                                           | 10 <sup>-6</sup> mol/l P4; 3 days                                         | hESF; unknown endometriosis status                                 | Human CHIP 1K set 1 (1000 gene cDNA platform)             |
| White CA, Dimitriadis E, Sharkey AM, Salamonsen LA. Interleukin-11 inhibits expression of insulin-like growth factor binding protein-5 mRNA in decidualizing human endometrial stromal cells. <i>Mol Hum Reprod</i> 2005; 11(9):649-658.                                                                                                                                                                           | 10nM E2+100nM P4 $\pm$ IL-11; 12 days                                     | hESF from hysterectomized patients with no endometrial dysfunction | Custom glass cDNA microarrays, Cambridge, UK              |
| Takano M, Lu Z, Goto T, Fusi L, Higham J, Francis J, Withey A, Hardt J, Cloke B, Stavropoulou AV, Ishihara O, Lam EW, Unterman TG, Brosens JJ, Kim JJ. Transcriptional cross talk between the forkhead transcription factor forkhead box O1A and the progesterone receptor coordinates cell cycle regulation and differentiation in human endometrial stromal cells. <i>Mol Endocrinol</i> 2007; 21(10):2334-2349. | 1 $\mu$ M P4+0.5mM 8-Br- (or db-) cAMP; 72hours                           | hESF from hysterectomized patients with no endometrial dysfunction | Affymetrix Human U133-Plus 2.0                            |

|                                                                                                                                                                                                                                                                                                                    |                                                               |                                                                             |                                             |
|--------------------------------------------------------------------------------------------------------------------------------------------------------------------------------------------------------------------------------------------------------------------------------------------------------------------|---------------------------------------------------------------|-----------------------------------------------------------------------------|---------------------------------------------|
| Lu Z, Hardt J, Kim JJ. Global analysis of genes regulated by HOXA10 in decidualization reveals a role in cell proliferation. <i>Mol Hum Reprod</i> 2008; 14(6):357-366                                                                                                                                             | 36nM E2+1µM P4+<br>0.1mM dibutyryl-cAMP±<br>siHOXA10; 48hours | hESF from hysterectomized patients with no endometrial dysfunction          | Affymetrix Human U133-Plus 2.0              |
| Lebovic DI, Baldocchi RA, Mueller MD, Taylor RN. Altered expression of a cell-cycle suppressor gene, Tob-1, in endometriotic cells by cDNA array analyses. <i>Fertil Steril</i> 2002; 78(4):849-854.                                                                                                               | 10 ng/mL IL-1β; 12hours                                       | Ectopic lesion stromal cells & hESF from women <u>without endometriosis</u> | Atlas Human cDNA Expression Array, Clontech |
| Aghajanova L, Horcujadas JA, Weeks JL, Esteban FJ, Nezhad CN, Conti M, Giudice LC. The protein kinase A pathway-regulated transcriptome of endometrial stromal fibroblasts reveals compromised differentiation and persistent proliferative potential in endometriosis. <i>Endocrinology</i> 2010; 151: 1341-1355. | 0.5mM 8-Br cAMP;<br>96hours                                   | hESF from women <u>with</u> or <u>without endometriosis</u>                 | Affymetrix Gene 1.0 ST                      |
| Present study                                                                                                                                                                                                                                                                                                      | 10nM E2+1µM P4;<br>0, 6, 48hours, 14days                      | hESF from women <u>with</u> or <u>without endometriosis</u>                 | Affymetrix Gene 1.0 ST                      |
